# Supplementary material for: A stepwise bulk-to-cluster-to-particle transformation toward the efficient synthesis of alkynyl-protected silver nanoclusters
Source: Royal Society of Chemistry journal article supplement (doi:10.1039/c6cc02950g), 2016-01-01
Supplement: c6cc02950g1.pdf [file c6cc02950g1.pdf]

## Supporting Information

### Stepwise bulk-to-cluster-to-particle transformation toward efficient synthesis of alkynyl-protected silver nanoclusters

Hui Guo,<sup>a,b</sup> Xin He,<sup>b</sup> Chong-Qing Wan,<sup>a,\*</sup> and Liang Zhao<sup>b,\*</sup>

<sup>a</sup> Beijing Key Laboratory for Optical Materials and Photonic Devices, Department of Chemistry, Capital Normal University, Beijing 100048, China.

E-mail: [wancq@cnu.edu.cn](mailto:wancq@cnu.edu.cn)

<sup>b</sup> Key Laboratory of Bioorganic Phosphorus Chemistry & Chemical Biology (Ministry of Education), Department of Chemistry, Tsinghua University, Beijing 100084, China.

E-mail: [zhaolchem@mail.tsinghua.edu.cn](mailto:zhaolchem@mail.tsinghua.edu.cn)

#### Synthesis

All commercially available chemicals were used without further purification. Methylazacalix[6]pyridine (**Py[6]**) was synthesized according to the literature method by the [3+3] fragment coupling protocol between terminal dibrominated and diaminated linear trimers.<sup>1</sup> **1a-f** were synthesized according to the literature.<sup>2-4</sup> The solvents used in this study were processed by standard procedures. <sup>1</sup>H-NMR experiments were carried out on a JEOL ECX-400MHz instrument.

**Synthesis of [Ag<sub>3</sub>(*p*-MeOC<sub>6</sub>H<sub>4</sub>C≡C)(Py[6])](CF<sub>3</sub>SO<sub>3</sub>)<sub>2</sub> (**2a**).** In a 5 mL glass vial, AgSO<sub>3</sub>CF<sub>3</sub> (25.7 mg, 0.1 mmol) was dissolved in CH<sub>3</sub>OH (1 ml) at room temperature. Then [*p*-MeOC<sub>6</sub>H<sub>4</sub>C≡CAg] (**1a**, 11.9 mg, 0.05 mmol) solid was added to the solution under stirring. After 5 min, a CH<sub>2</sub>Cl<sub>2</sub> solution (1 mL) of methylazacalix[6]pyridine (**Py[6]**, 6.4 mg, 0.01 mmol) was added dropwisely. The mixture was further stirred for 2 hours at room temperature. The solution was filtered and the filtrate was diffused by diethyl ether in the dark. After several days, pale yellow crystals of **2a** were deposited.

**Synthesis of 2b-f.** The synthesis of complexes **2b-f** is identical with the synthetic method for **2a** but with other substituted silver phenylacetylides **1b-f** in place of **1a**.

**Preparation of 2d-NP.** In a 10 mL glass vial,  $\text{HPF}_6$  (0.2 mmol) was added dropwisely to the solution of **2d** (0.8 g/L, 3.5 mL). The solution was centrifuged to give the solid sample of **2d-NP**. This sample was washed three times by ethanol and was then dispersed in toluene for TEM and UV-vis studies.

**Preparation of 2d-Ag-NC.** In a 10 mL glass vials,  $\text{HPF}_6$  (0.2 mmol) was added dropwisely to the solution of **2d** (0.8 g/L), respectively. The solution was centrifuged to give a solid sample of **2d-NP**. The solid sample was washed three times by ethanol and was then dispersed in toluene. Then  $\text{NaBH}_4$  (0.01 mmol, in ethanol) was added dropwisely to the solution of **2d-NP** at 0 °C. The solution was centrifuged to give the solid sample of **2d-Ag-NC**. This solid was washed three times by ethanol and was dispersed in toluene for TEM and UV-vis studies.

### X-ray crystallographic analysis

Data for complex **2a** (CCDC-1441335) was collected at 296K with Mo- $K\alpha$  radiation ( $\lambda = 0.71073 \text{ \AA}$ ) on a Bruker APEXII CCD diffractometer with frames of oscillation range 0.5°. All structures were solved by direct methods, and non-hydrogen atoms were located from difference Fourier maps. All non-hydrogen atoms were subjected to anisotropic refinement by full-matrix least-squares on  $F^2$  by using the SHELXTL program unless otherwise noticed.<sup>5</sup>

Crystal data for  $[\text{Ag}_3(p\text{-MeOC}_6\text{H}_4\text{C}\equiv\text{C})(\text{Py}[6])](\text{CF}_3\text{SO}_3)_2$  (**2a**):  $\text{C}_{47}\text{H}_{43}\text{Ag}_3\text{F}_6\text{N}_{12}\text{O}_7\text{S}_2$ ,  $M = 1389.66$ , triclinic, space group  $P-1$ ,  $a = 12.88(3) \text{ \AA}$ ,  $b = 13.13(4) \text{ \AA}$ ,  $c = 15.88(4) \text{ \AA}$ ,  $\alpha = 99.38(2)$ ,  $\beta = 90.29(3)$ ,  $\gamma = 101.76(6)$ ,  $V = 2593(12) \text{ \AA}^3$ ,  $Z = 2$ ,  $T = 296(2) \text{ K}$ ,  $D_c = 1.780 \text{ g/cm}^3$ . The structure, refined on  $F^2$ , converged for 12200 unique reflections ( $R_{\text{int}} = 0.0373$ ) and 9286 observed reflections with  $I > 2\sigma(I)$  to give  $R_1 = 0.0450$  and  $wR_2 = 0.1179$  and a goodness-of-fit = 1.033.

**Bond distances (Å) and angles (°) of 2a:**

|         |          |         |          |
|---------|----------|---------|----------|
| Ag1-C37 | 2.143(6) | Ag3-C37 | 2.297(6) |
| Ag1-N9  | 2.255(5) | Ag3-N5  | 2.333(6) |
| Ag1-Ag2 | 3.195(6) | Ag3-C38 | 2.429(6) |
| Ag2-C37 | 2.123(6) | Ag3-C10 | 2.574(7) |
| Ag2-N1  | 2.252(5) | Ag3-C20 | 2.676(6) |
| Ag2-Ag3 | 3.356(9) | N7-C23  | 1.350(5) |
| N1-C1   | 1.357(6) | N7-C19  | 1.351(6) |
| N1-C5   | 1.363(6) | C19-C20 | 1.406(6) |
| C1-C2   | 1.395(6) | C20-C21 | 1.402(6) |
| C1-N12  | 1.420(6) | C21-C22 | 1.392(7) |
| C2-C3   | 1.392(7) | C22-C23 | 1.407(6) |
| C3-C4   | 1.385(7) | C23-N8  | 1.409(6) |
| C4-C5   | 1.395(6) | N8-C25  | 1.419(6) |
| C5-N2   | 1.412(6) | N8-C24  | 1.471(6) |
| N2-C7   | 1.402(6) | N9-C25  | 1.361(6) |
| N2-C6   | 1.475(6) | N9-C29  | 1.367(5) |
| N3-C11  | 1.348(6) | C25-C26 | 1.403(6) |
| N3-C7   | 1.359(6) | C26-C27 | 1.400(7) |
| C7-C8   | 1.407(7) | C27-C28 | 1.363(7) |
| C8-C9   | 1.379(7) | C28-C29 | 1.400(6) |
| C9-C10  | 1.401(6) | C29-N10 | 1.400(6) |
| C10-C11 | 1.413(7) | N10-C31 | 1.414(6) |
| C11-N4  | 1.411(6) | N10-C30 | 1.485(6) |
| N4-C13  | 1.408(6) | N11-C31 | 1.345(6) |
| N4-C12  | 1.477(7) | N11-C35 | 1.358(6) |
| N5-C17  | 1.360(6) | C31-C32 | 1.412(7) |
| N5-C13  | 1.362(6) | C32-C33 | 1.392(7) |
| C13-C14 | 1.402(6) | C33-C34 | 1.394(6) |
| C14-C15 | 1.384(7) | C34-C35 | 1.404(7) |
| C15-C16 | 1.382(7) | C35-N12 | 1.400(6) |
| C16-C17 | 1.401(6) | N12-C36 | 1.473(6) |
| C17-N6  | 1.410(6) | O1-C42  | 1.375(5) |
| N6-C19  | 1.412(5) | O1-C45  | 1.442(7) |
| N6-C18  | 1.480(6) | C37-C38 | 1.236(6) |
| S1-O3   | 1.431(5) | C38-C39 | 1.454(6) |
| S1-O2   | 1.435(5) | C39-C40 | 1.396(6) |
| S1-O4   | 1.440(5) | C39-C44 | 1.400(7) |
| S1-C46  | 1.822(6) | C40-C41 | 1.390(6) |
| F11-C46 | 1.337(7) | C41-C42 | 1.389(7) |
| F12-C46 | 1.328(6) | C42-C43 | 1.395(7) |
| F13-C46 | 1.344(7) | C43-C44 | 1.386(7) |

|        |          |         |          |
|--------|----------|---------|----------|
| S2-O5  | 1.435(5) | F21-C47 | 1.324(7) |
| S2-O6  | 1.439(5) | F22-C47 | 1.367(9) |
| S2-O7  | 1.446(4) | F23-C47 | 1.336(8) |
| S2-C47 | 1.806(8) |         |          |

|               |            |               |           |
|---------------|------------|---------------|-----------|
| C37- Ag1- N9  | 164.16(13) | N10- C29- C28 | 121.9(4)  |
| C37- Ag1- Ag2 | 41.26(13)  | C29- N10- C31 | 122.6(3)  |
| N9- Ag1- Ag2  | 154.57(10) | C29- N10- C30 | 118.5(4)  |
| C37- Ag2- N1  | 174.98(14) | C31- N10- C30 | 118.9(4)  |
| C37- Ag2- Ag1 | 41.76(13)  | C31- N11- C35 | 118.4(4)  |
| N1- Ag2- Ag1  | 140.07(13) | N11- C31- C32 | 122.8(4)  |
| C37- Ag2- Ag3 | 42.57(16)  | N11- C31- N10 | 115.8(4)  |
| N1- Ag2- Ag3  | 132.45(16) | C32- C31- N10 | 121.3(4)  |
| Ag1- Ag2- Ag3 | 65.04(14)  | C33- C32- C31 | 117.4(4)  |
| C37- Ag3- N5  | 142.81(17) | C32- C33- C34 | 121.0(4)  |
| C37- Ag3- C38 | 30.16(14)  | C33- C34- C35 | 117.3(4)  |
| N5- Ag3- C38  | 112.85(19) | N11- C35- N12 | 115.4(4)  |
| C37- Ag3- C10 | 133.46(18) | N11- C35- C34 | 123.0(4)  |
| N5- Ag3- C10  | 73.93(18)  | N12- C35- C34 | 121.7(4)  |
| C38- Ag3- C10 | 149.16(14) | C35- N12- C1  | 121.5(4)  |
| C37- Ag3- C20 | 124.75(18) | C35- N12- C36 | 120.0(4)  |
| N5- Ag3- C20  | 73.6(2)    | C1- N12- C36  | 117.5(4)  |
| C38- Ag3- C20 | 125.38(18) | C42- O1- C45  | 117.0(4)  |
| C10- Ag3- C20 | 85.44(18)  | C38- C37- Ag2 | 141.5(3)  |
| C37- Ag3- Ag2 | 38.69(12)  | C38- C37- Ag1 | 120.5(3)  |
| N5- Ag3- Ag2  | 151.49(11) | Ag2- C37- Ag1 | 96.98(19) |
| C38- Ag3- Ag2 | 64.48(11)  | C38- C37- Ag3 | 80.9(3)   |
| C10- Ag3- Ag2 | 94.85(12)  | Ag2- C37- Ag3 | 98.7(2)   |
| C20- Ag3- Ag2 | 132.66(14) | Ag1- C37- Ag3 | 105.0(2)  |
| C1- N1- C5    | 118.8(3)   | C37- C38- C39 | 177.7(4)  |
| C1- N1- Ag2   | 118.5(3)   | C37- C38- Ag3 | 69.0(3)   |
| C5- N1- Ag2   | 121.3(3)   | C39- C38- Ag3 | 112.1(3)  |
| N1- C1- C2    | 122.1(4)   | C40- C39- C44 | 118.6(4)  |
| N1- C1- N12   | 117.8(3)   | C40- C39- C38 | 120.4(4)  |
| C2- C1- N12   | 120.1(4)   | C44- C39- C38 | 121.1(4)  |
| C3- C2- C1    | 118.7(4)   | C41- C40- C39 | 121.2(4)  |
| C4- C3- C2    | 119.6(4)   | C42- C41- C40 | 119.4(4)  |
| C3- C4- C5    | 119.3(5)   | O1- C42- C41  | 123.8(4)  |
| N1- C5- C4    | 121.5(4)   | O1- C42- C43  | 116.1(4)  |
| N1- C5- N2    | 117.9(3)   | C41- C42- C43 | 120.1(4)  |
| C4- C5- N2    | 120.6(4)   | C44- C43- C42 | 120.1(4)  |
| C7- N2- C5    | 121.9(4)   | C43- C44- C39 | 120.5(4)  |

|               |          |               |          |
|---------------|----------|---------------|----------|
| C7- N2- C6    | 119.2(4) | O3- S1- O2    | 115.0(3) |
| C5- N2- C6    | 118.8(4) | O3- S1- O4    | 114.2(3) |
| C11- N3- C7   | 118.0(4) | O2- S1- O4    | 115.6(3) |
| N3- C7- N2    | 115.0(4) | O3- S1- C46   | 104.6(3) |
| N3- C7- C8    | 122.7(4) | O2- S1- C46   | 102.4(3) |
| N2- C7- C8    | 122.2(4) | O4- S1- C46   | 102.7(3) |
| C9- C8- C7    | 118.3(4) | F12- C46- F11 | 106.0(5) |
| C8- C9- C10   | 120.4(4) | F12- C46- F13 | 108.8(5) |
| C9- C10- C11  | 117.4(4) | F11- C46- F13 | 106.8(4) |
| C9- C10- Ag3  | 97.6(3)  | F12- C46- S1  | 112.6(4) |
| C11- C10- Ag3 | 80.8(3)  | F11- C46- S1  | 112.0(4) |
| N3- C11- N4   | 114.9(4) | F13- C46- S1  | 110.4(4) |
| N3- C11- C10  | 123.1(4) | O5- S2- O6    | 113.5(3) |
| N4- C11- C10  | 122.0(4) | O5- S2- O7    | 114.8(3) |
| C13- N4- C11  | 123.6(4) | O6- S2- O7    | 116.0(3) |
| C13- N4- C12  | 118.0(4) | O5- S2- C47   | 103.8(4) |
| C11- N4- C12  | 118.2(4) | O6- S2- C47   | 102.8(3) |
| C17- N5- C13  | 119.1(3) | O7- S2- C47   | 103.6(3) |
| C17- N5- Ag3  | 122.2(3) | F21- C47- F23 | 107.9(6) |
| C13- N5- Ag3  | 117.8(3) | F21- C47- F22 | 107.6(6) |
| N5- C13- C14  | 121.7(4) | F23- C47- F22 | 107.7(6) |
| N5- C13- N4   | 118.5(3) | F21- C47- S2  | 111.7(5) |
| C14- C13- N4  | 119.6(4) | F23- C47- S2  | 111.3(5) |
| C15- C14- C13 | 118.1(4) | F22- C47- S2  | 110.5(5) |
| C16- C15- C14 | 120.9(4) | N7- C23- C22  | 122.1(4) |
| C15- C16- C17 | 118.5(4) | N7- C23- N8   | 115.1(4) |
| N5- C17- C16  | 121.5(4) | C22- C23- N8  | 122.8(3) |
| N5- C17- N6   | 118.1(3) | C23- N8- C25  | 123.2(3) |
| C16- C17- N6  | 120.1(4) | C23- N8- C24  | 117.9(4) |
| C17- N6- C19  | 124.0(3) | C25- N8- C24  | 118.7(4) |
| C17- N6- C18  | 117.6(3) | C25- N9- C29  | 118.6(4) |
| C19- N6- C18  | 118.3(4) | C25- N9- Ag1  | 119.7(2) |
| C23- N7- C19  | 119.5(3) | C29- N9- Ag1  | 120.7(3) |
| N7- C19- C20  | 122.4(4) | N9- C25- C26  | 121.9(4) |
| N7- C19- N6   | 115.4(4) | N9- C25- N8   | 117.4(4) |
| C20- C19- N6  | 122.1(4) | C26- C25- N8  | 120.5(4) |
| C21- C20- C19 | 117.1(4) | C27- C26- C25 | 118.1(4) |
| C21- C20- Ag3 | 96.5(3)  | C28- C27- C26 | 120.3(4) |
| C19- C20- Ag3 | 81.7(3)  | C27- C28- C29 | 119.4(4) |
| C22- C21- C20 | 121.1(4) | N9- C29- N10  | 116.5(4) |
| C21- C22- C23 | 117.6(4) | N9- C29- C28  | 121.5(4) |

## TEM Characterization

The morphology and size distribution of as-prepared Ag nanoparticles and nanoclusters was determined on a Hitachi H-7650 transmission electron microscope. The EDX and trials for searching lattice fringe of **2d-NP** were taken by a JEOL JEM-2011 and a FEI Tecnai G<sup>2</sup> 20 high-resolution transmission electron microscope.

**The yield determining of 2b-f-Ag-NC.** In five 50 mL round-bottom flasks, **2b-f** (0.01 mmol,  $[\text{Ag}_3(p\text{-C}_n\text{H}_{2n+1}\text{OC}_6\text{H}_4\text{C}\equiv\text{C})(\text{Py}[6])](\text{CF}_3\text{SO}_3)_2$ , n=8, 10, 12, 14, 16) was dissolved in  $\text{CH}_3\text{OH}/\text{CH}_2\text{Cl}_2$  (10 ml/10 ml) at room temperature, respectively.  $\text{HPF}_6$  (0.2 mmol) was added dropwisely to the solutions of **2b-f**, respectively. The solutions were centrifuged to give solid samples, which were washed three times by ethanol and were dispersed in toluene. Then  $\text{NaBH}_4$  (0.01 mmol, in ethanol) was added dropwisely to the solutions of **2b-f-NP** at 0 °C. The solutions were centrifuged to give solid samples of **2b-f-Ag-NC**. The solid samples were washed three times by ethanol. The dry solid samples each was respectively added in a solution of  $\text{HNO}_3$  (16 mol/L, 2 mL). The resulting solutions were titrated by an aqueous solution of NaCl (0.1 mmol, 10 mL) to produce AgCl. The solids of AgCl were collected, washed and dried to measure their weight. The mass of acquired AgCl were 4.1 mg, 3.9 mg, 4.0 mg, 3.9 mg, 3.8 mg for **2b-f**, respectively. Then the yields of **2b-f-Ag-NC** were calculated as 95%, 91%, 93%, 91%, 88%, respectively.

## References

- [1] E.-X. Zhang, D.-X. Wang, Q.-Y. Zheng, M.-X. Wang, *Org. Lett.*, **2008**, *10*, 2565.
- [2] A. Ikeda, M. Omote, K. Kusumoto, A. Tarui, K. Sato, A. Ando, *Org. Biomol. Chem.*, **2015**, *13*, 8886.
- [3] S.-J. Lee, C.-R. Park, J.-Y. Chang, *Langmuir*, **2004**, *20*, 9513.
- [4] C.-Y. Gao, L. Zhao and M.-X. Wang, *J. Am. Chem. Soc.*, **2012**, *134*, 824.
- [5] a) G. M. Sheldrick, SHELXS-97 (Univ. Göttingen, 1990). b) G. M. Sheldrick, SHELXL-97 (Univ. Göttingen, 1997).

## Supporting Figures

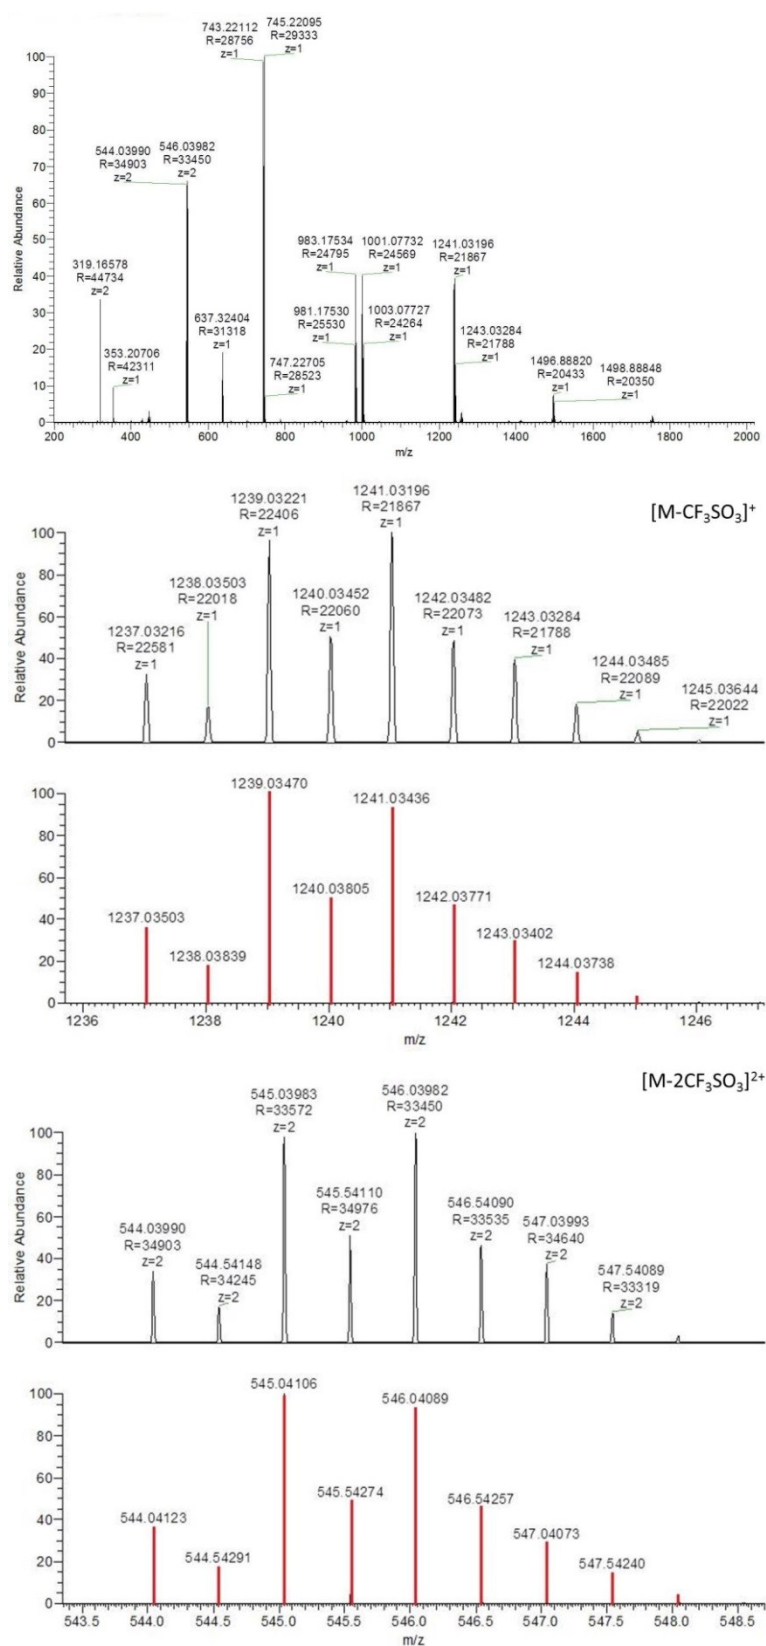

**Figure S1.** Electrospray ionization mass spectroscopy (ESI-MS) of complex **2a**.  $[M-CF_3SO_3]^+$ : 1241.0320,  $[M-2CF_3SO_3]^{2+}$ : 546.0398.

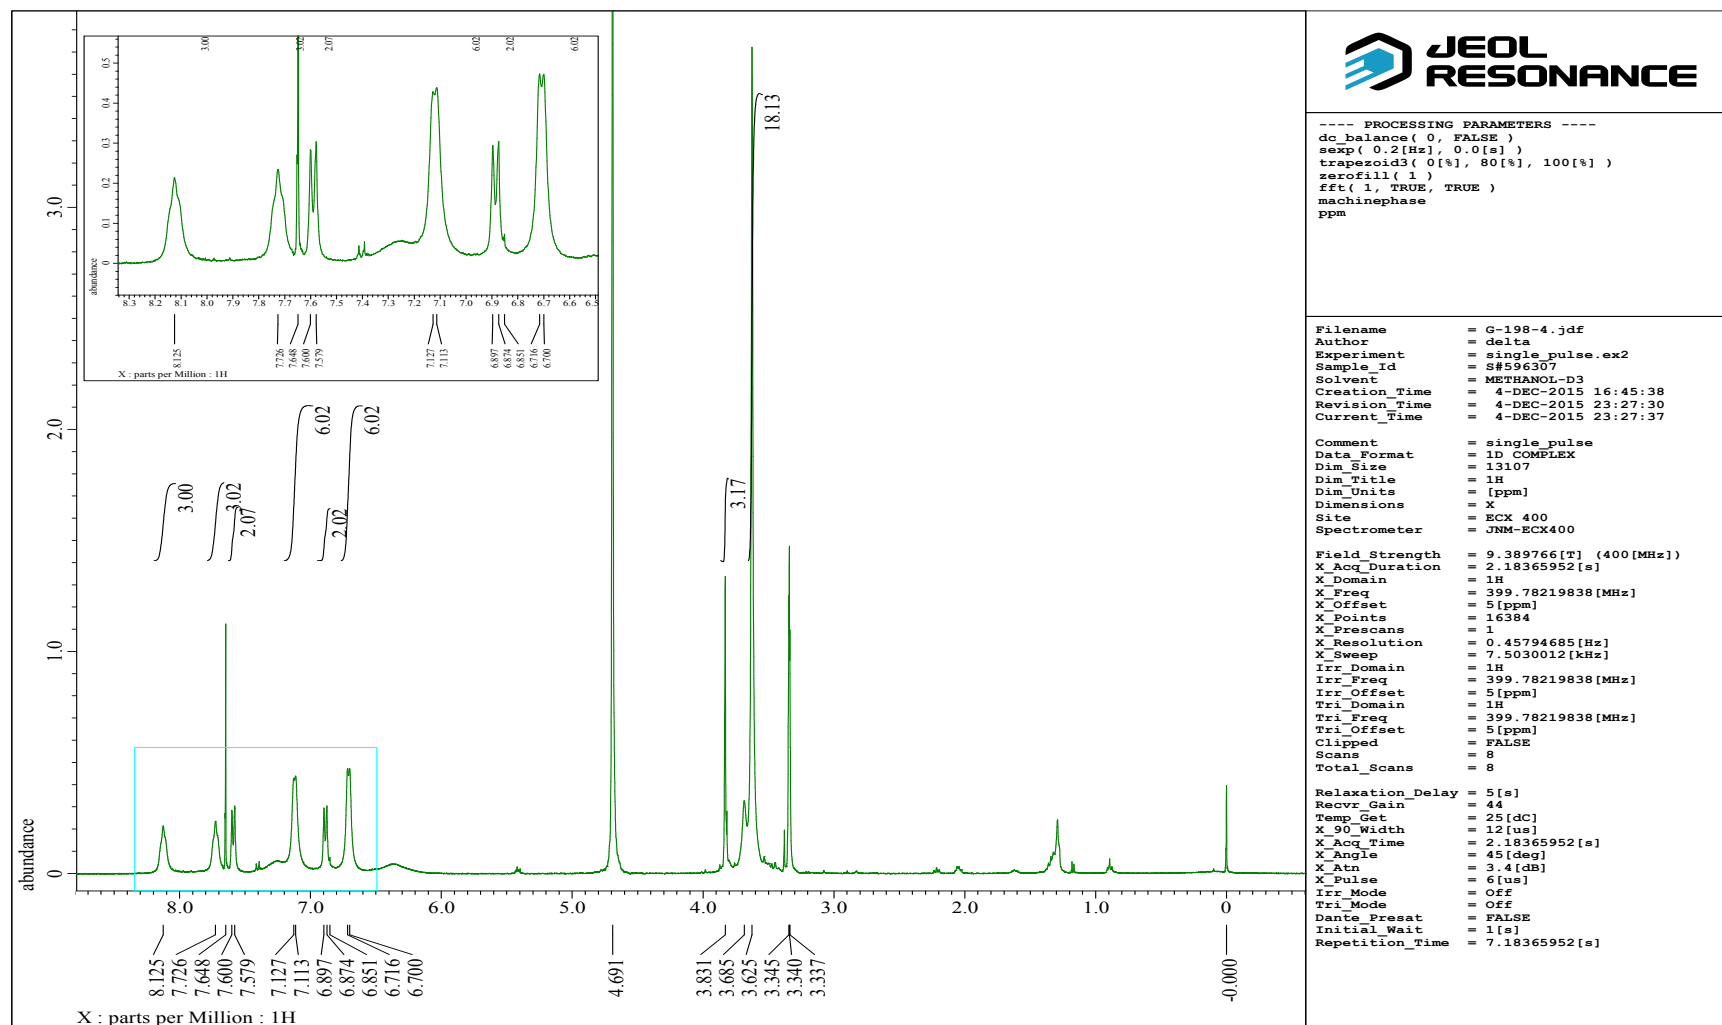



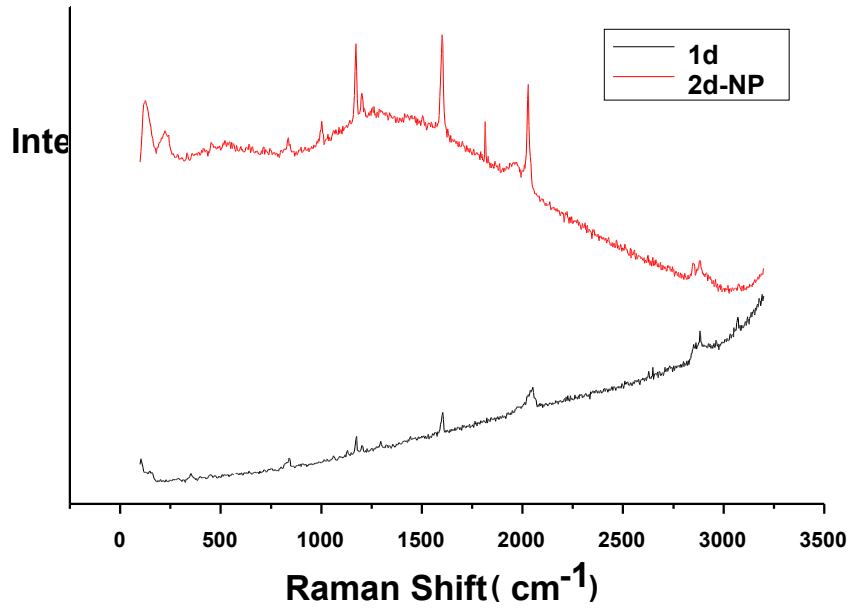

**Figure S3.** Raman spectrum of **1d** and **2d-NP**. The raman shift of  $C\equiv C$  in **1d** is  $2047\text{ cm}^{-1}$  but  $2029\text{ cm}^{-1}$  in **2d-NP**.

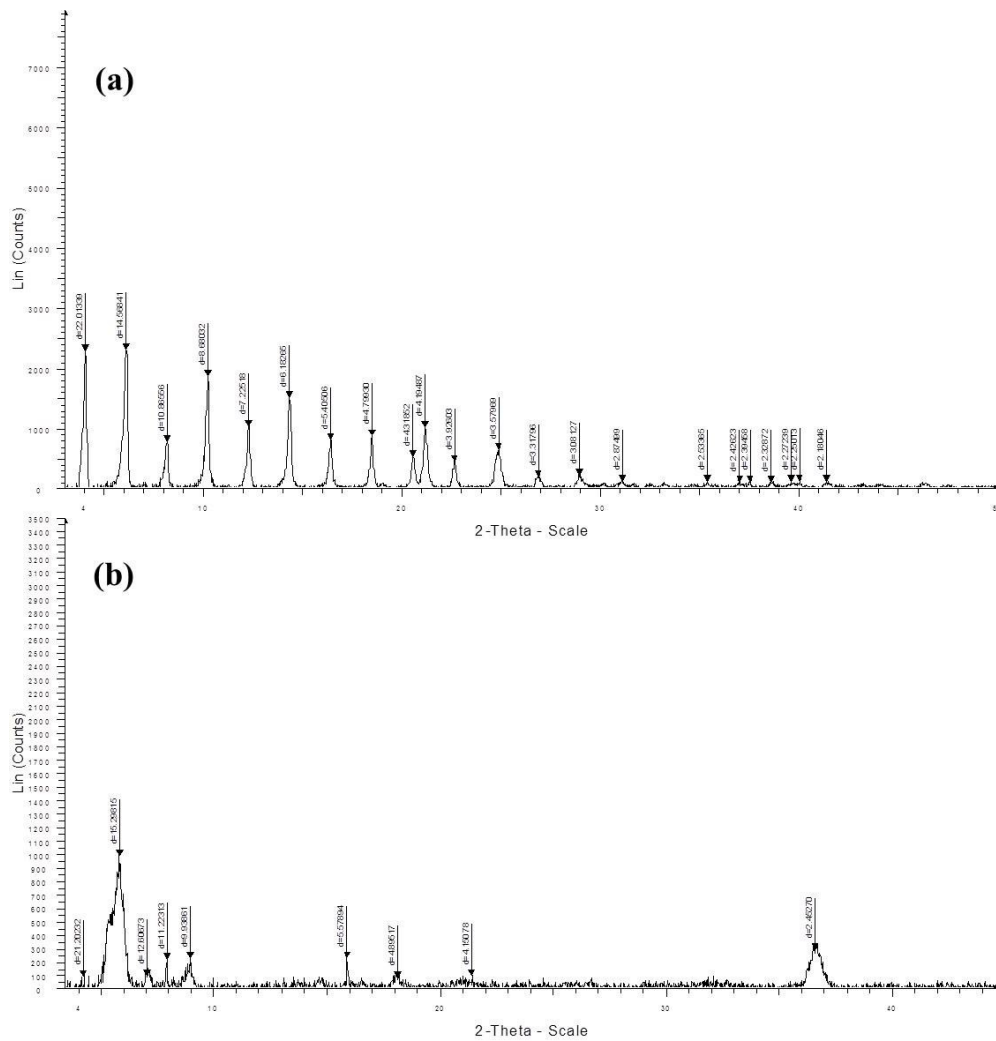

**Figure S4.** Powder X-ray diffraction (PXRD) of (a) **1d** and (b) **2d-NP**.

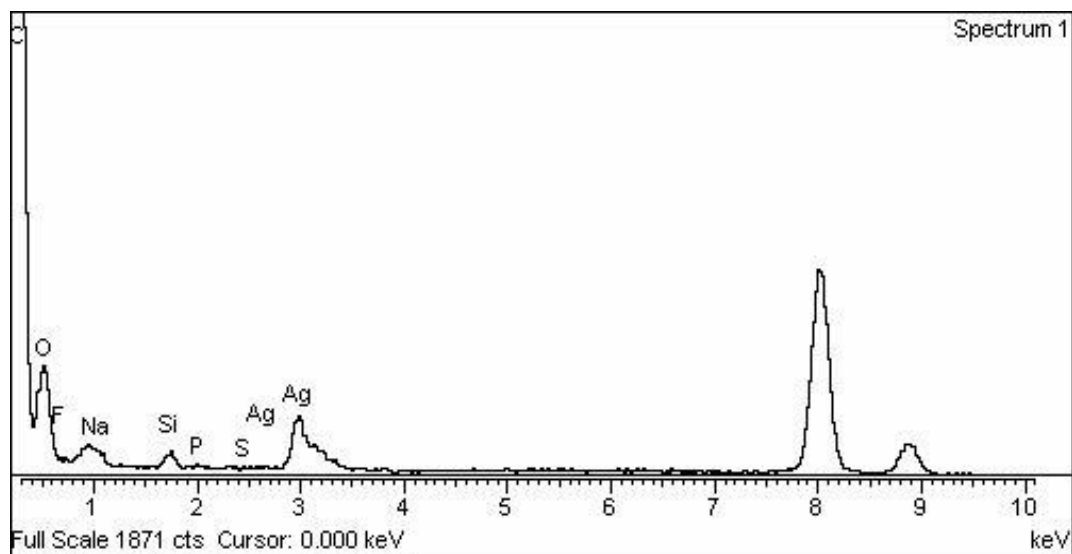

**Figure S5.** Energy dispersive X-ray spectroscopy (EDX) of **2d-NP**, suggesting the presence of the elements Ag, C, O, F, S and P.

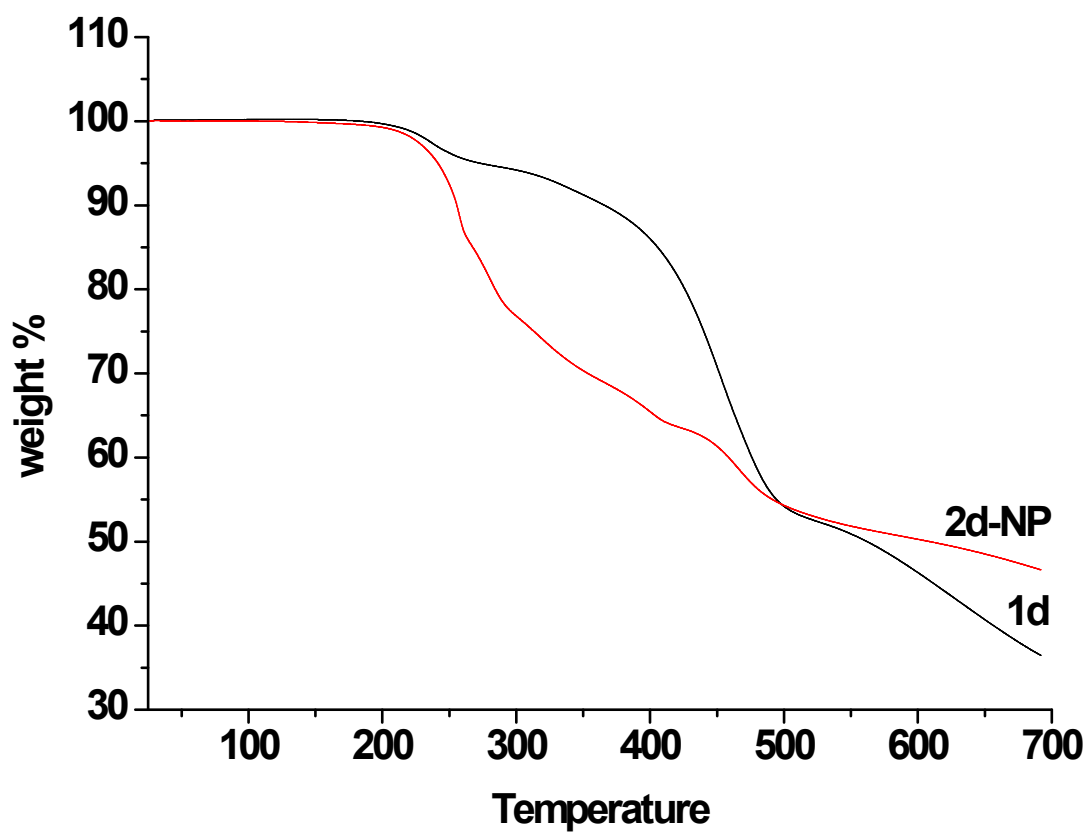

**Figure S6.** Thermal gravimetric analysis (TGA) of **1d** and **2d-NP**.

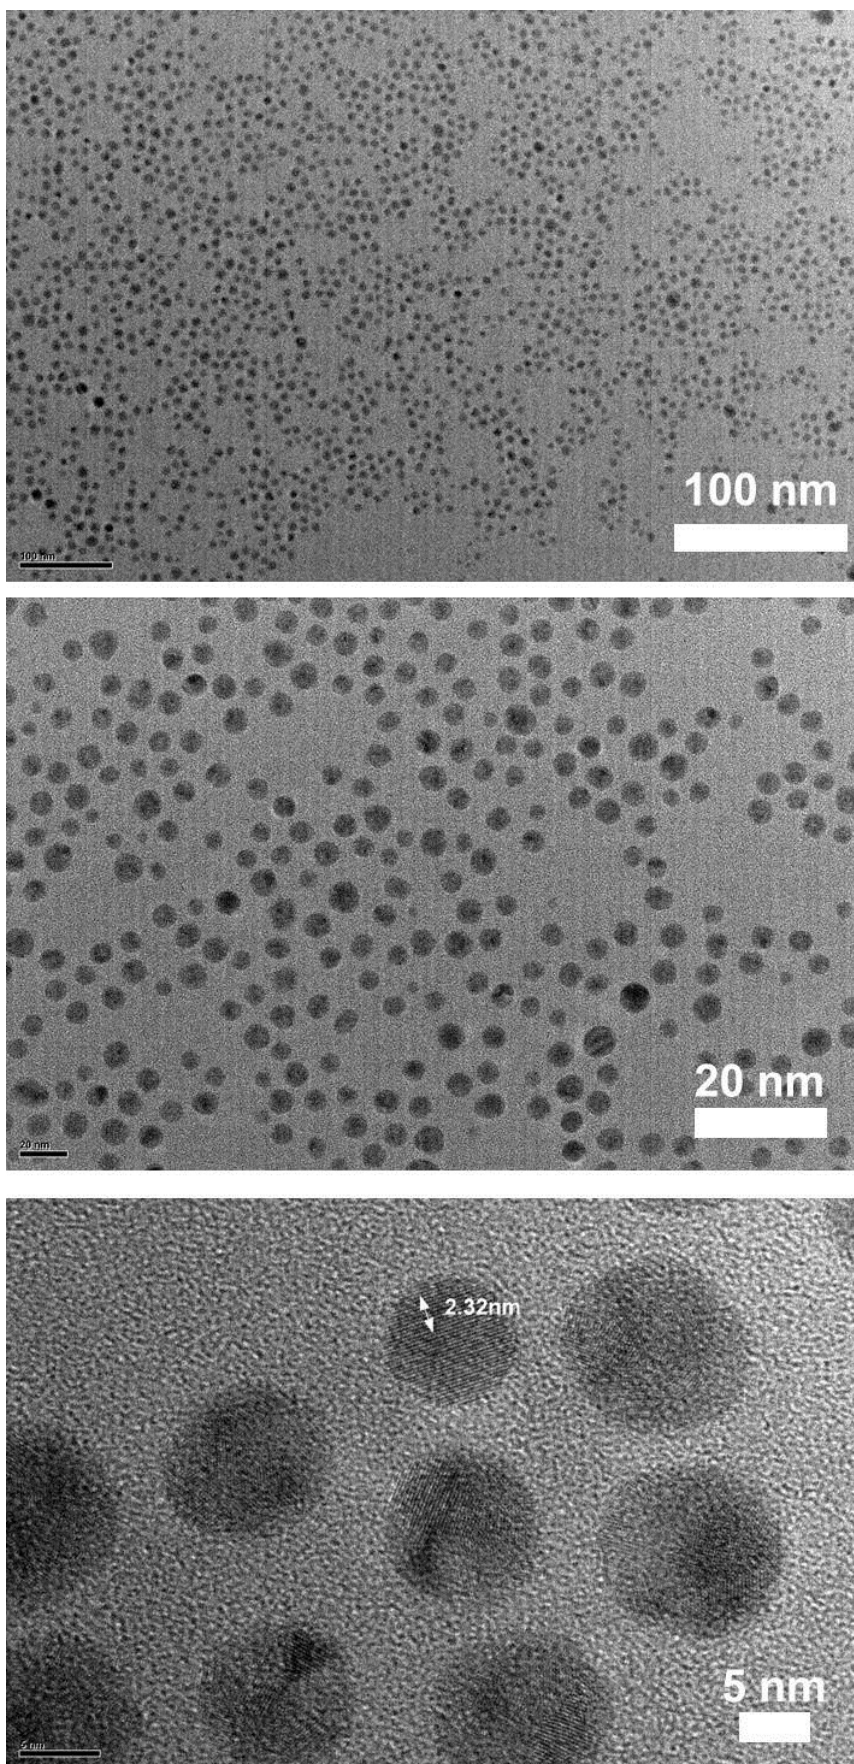

**Figure S7.** High-resolution TEM of 2d-NP.

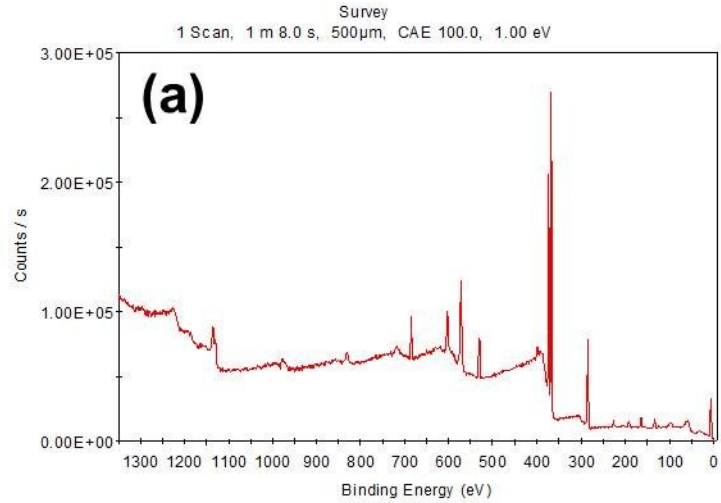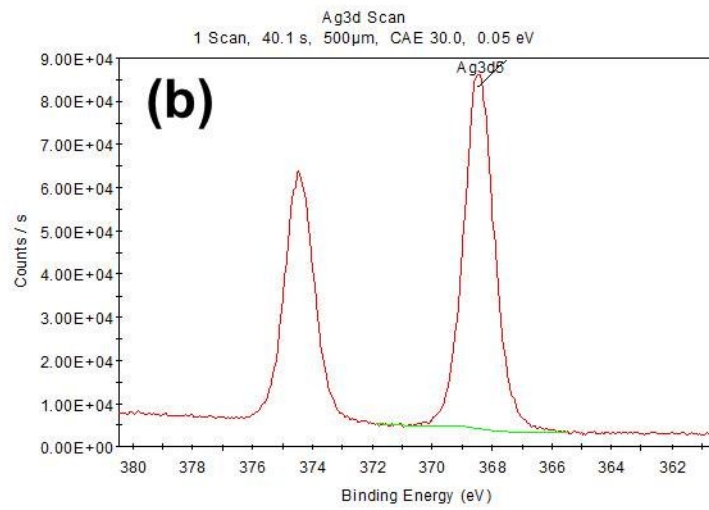

| Name  | Start BE | Peak BE | End BE | Height CPS | FWHM eV | Area (P) CPS.eV | Area (N) TPP-2M | Atomic % |
|-------|----------|---------|--------|------------|---------|-----------------|-----------------|----------|
| Ag3d5 | 371.32   | 368.15  | 364.79 | 82452.95   | 1.1     | 102380.28       | 0.1             | 13.09    |
| P2p   | 140.07   | 133.41  | 129.42 | 1425.41    | 1.97    | 3742.1          | 0.03            | 4.32     |
| S2p   | 171.22   | 161.51  | 158.17 | 2348.52    | 1.15    | 3959.11         | 0.03            | 3.31     |
| C1s   | 291.77   | 284.49  | 279.42 | 21544.56   | 1.24    | 34219.47        | 0.43            | 55.73    |
| N1s   | 404.97   | 400.08  | 395.72 | 1674.7     | 1.96    | 4275.89         | 0.03            | 4.31     |
| O1s   | 538.87   | 530.47  | 526.22 | 8238       | 1.47    | 18049.81        | 0.09            | 11.1     |
| F1s   | 692.37   | 685.93  | 681.87 | 8966.11    | 1.68    | 17623.93        | 0.06            | 8.13     |

**Figure S8.** X-ray photoelectron spectroscopy (XPS) of **2d-NP**. The binding energy peaks of Ag3d are 368.47 and 374.47 eV.

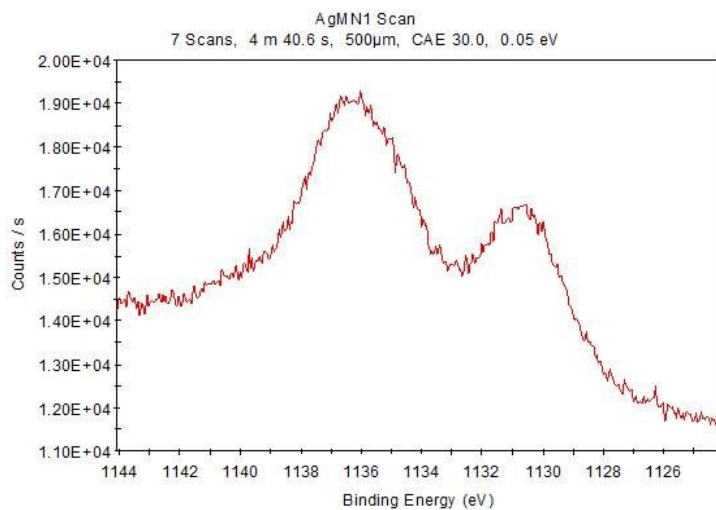

**Figure S9.** Auger electron spectroscopy (AES) of **2d-NP**. The binding energy peaks of Ag are 1130.57 and 1136.52 eV.

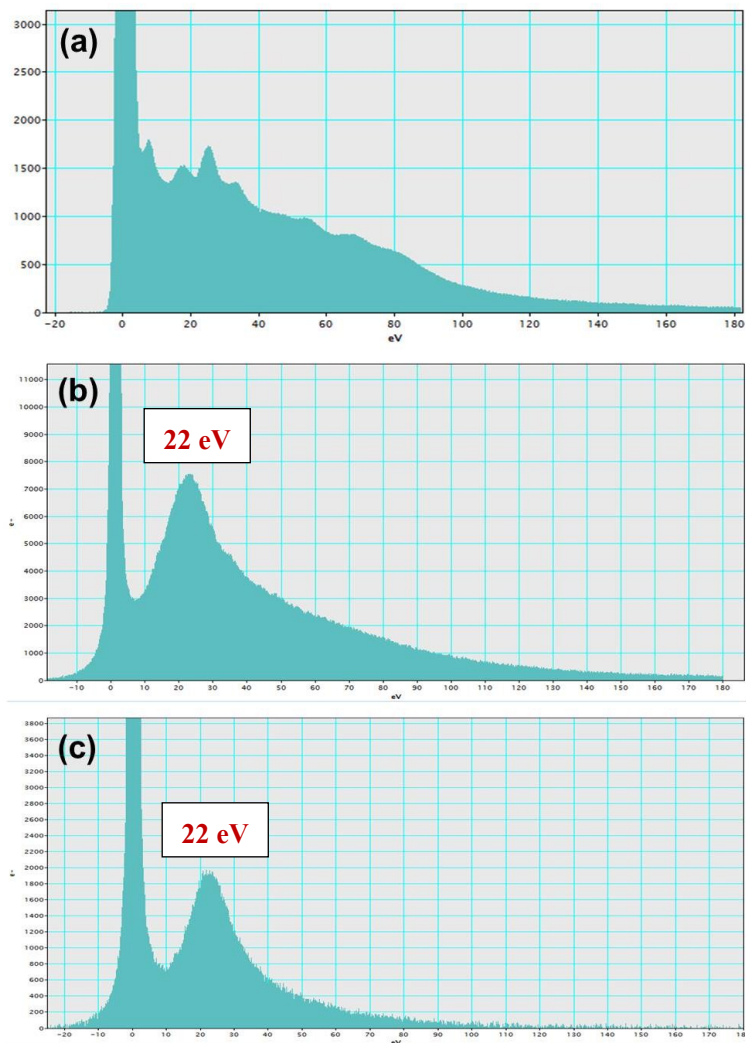

**Figure S10.** Electron energy loss spectroscopy (EELS) of (a) metallic Ag, (b) Ag<sub>2</sub>S NPs, (c) 2d-NP.

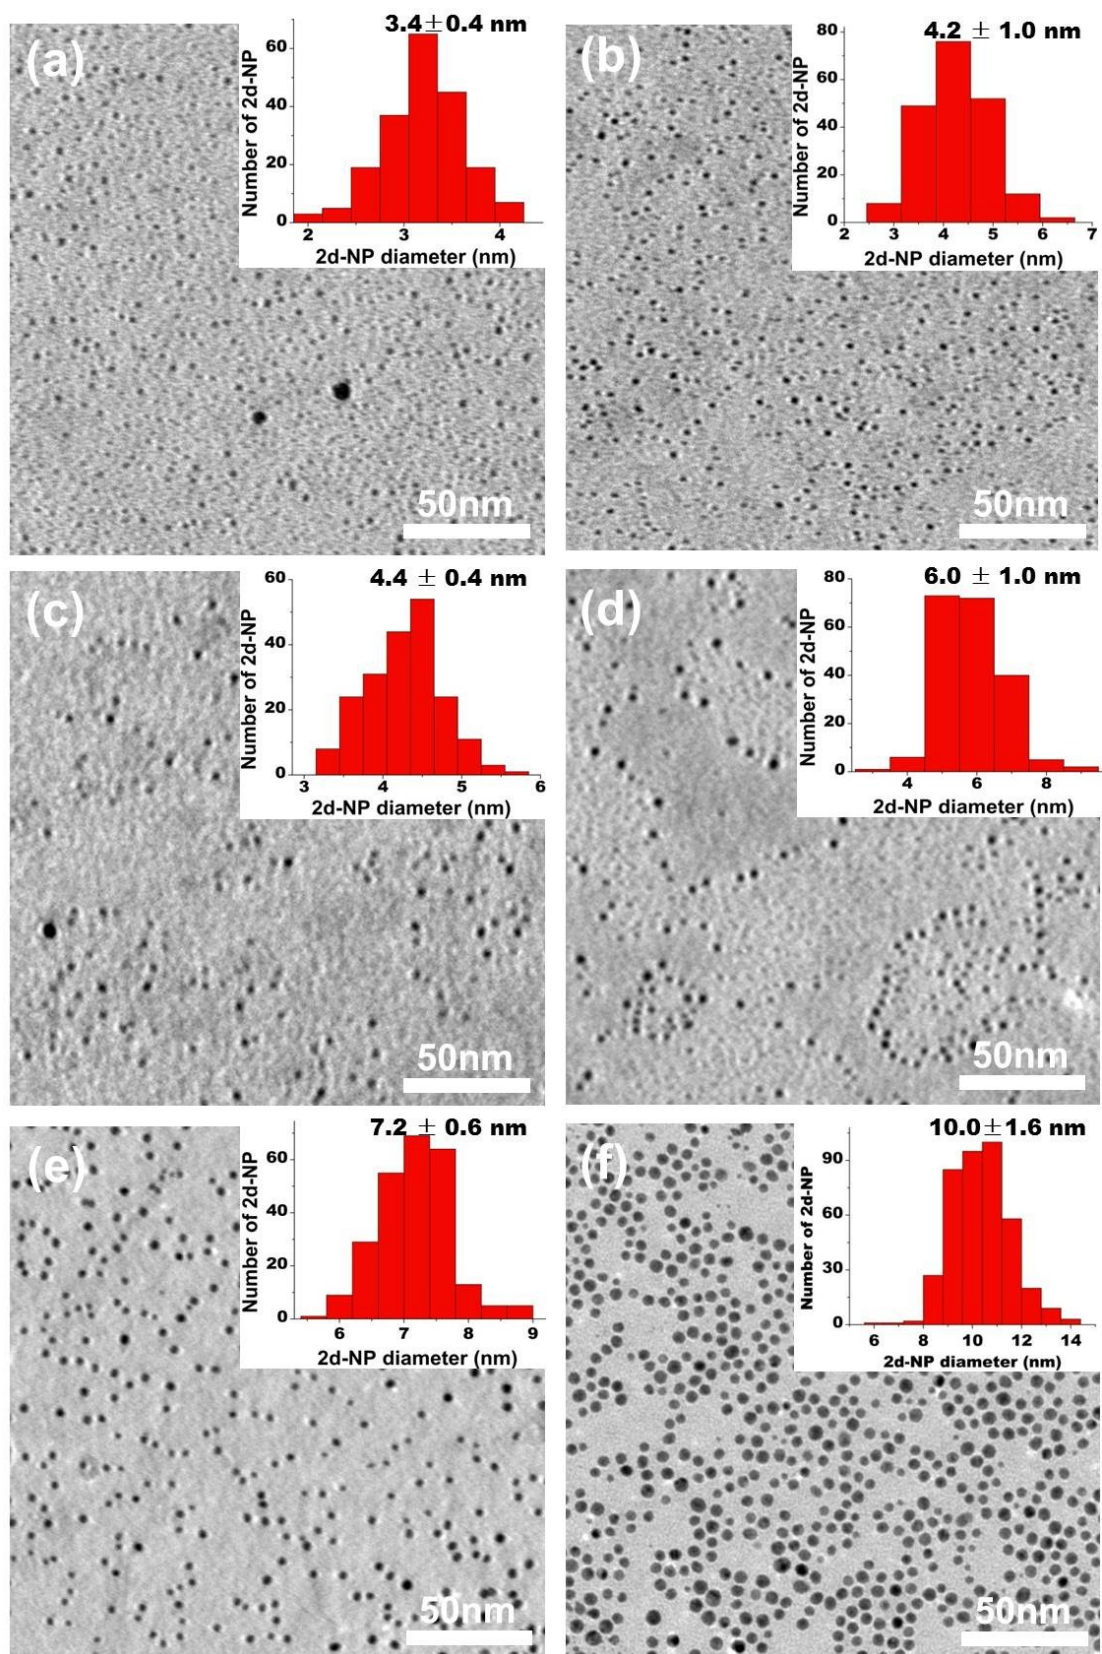

**Figure S11.** TEM images of differently sized 2d-NP. The concentration of 2d is (a) 0.8 g/L, 0.5 mL; (b) 0.8 g/L, 1.0 mL; (c) 0.8 g/L, 1.5 mL; (d) 0.8 g/L, 2.0 mL; (e) 0.8 g/L, 3.0 mL and (f) 0.8 g/L, 3.5 mL.

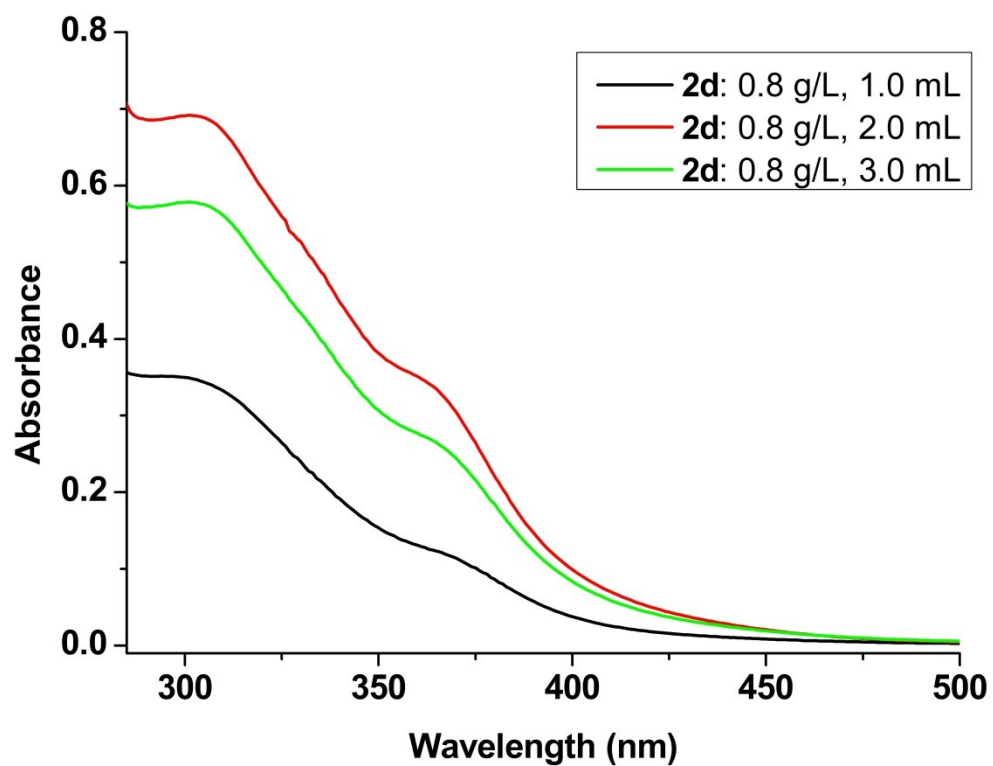

**Figure S12.** UV-vis absorption spectra of differently sized **2d-NP**. The two absorption peaks are 300 and 362 nm.



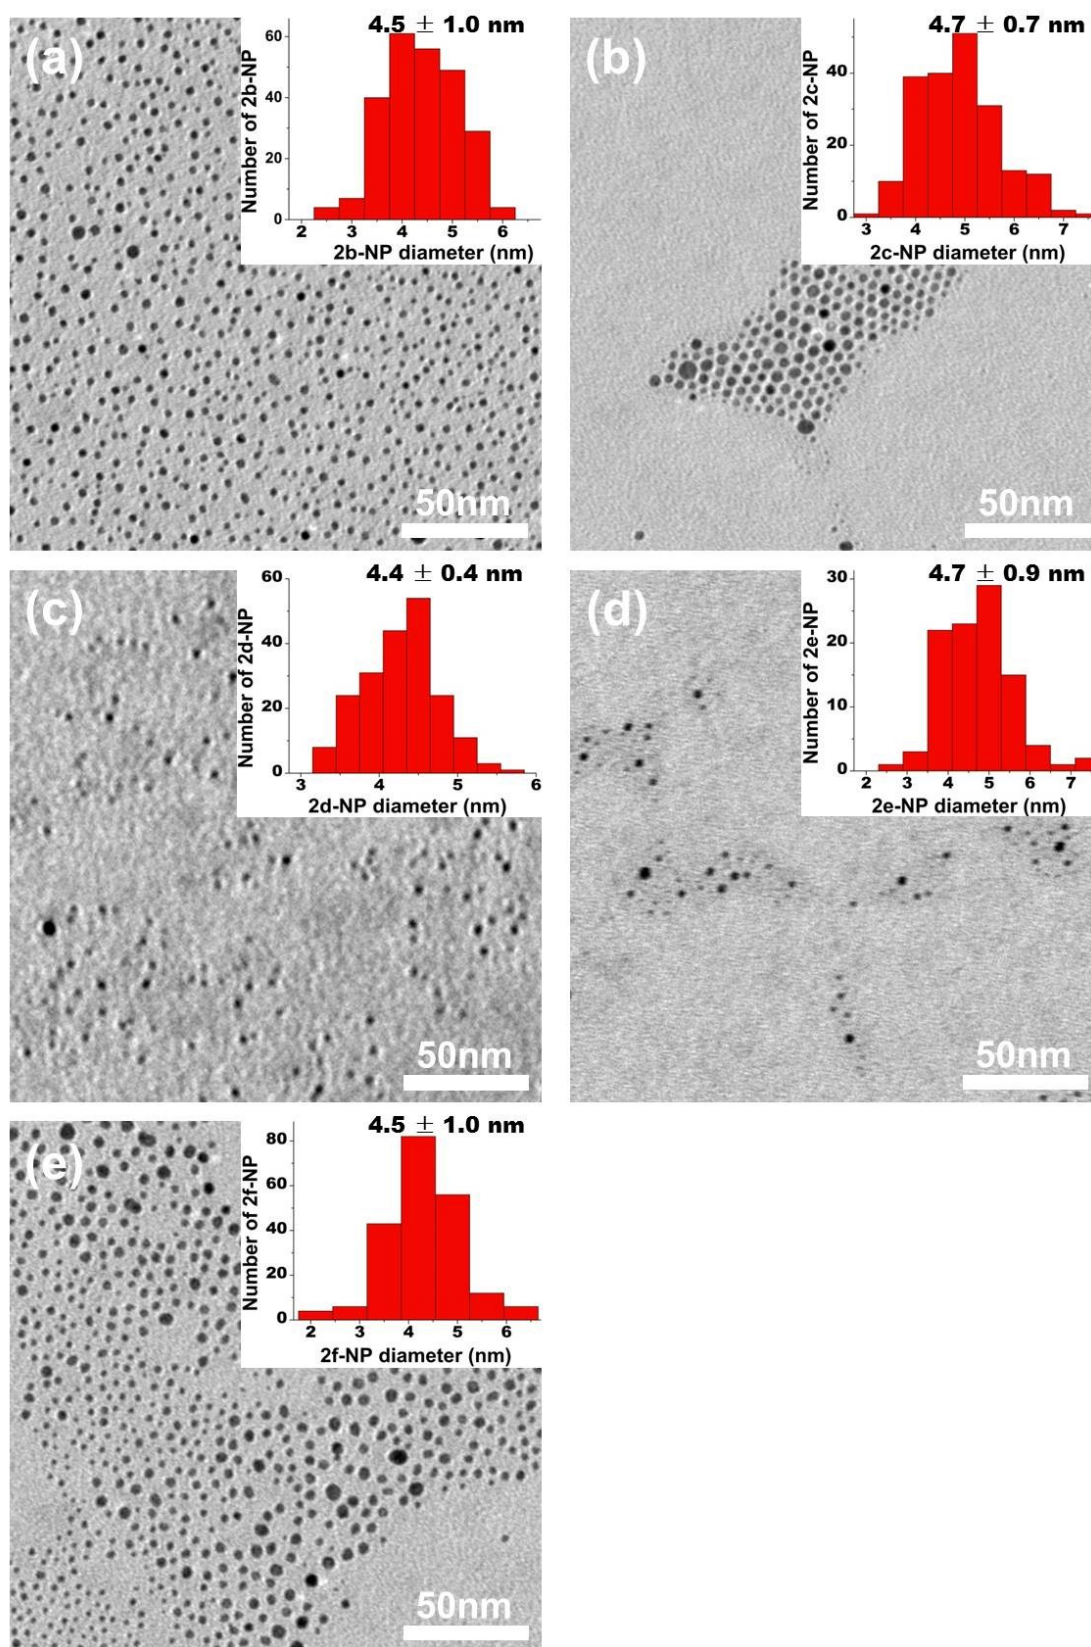

**Figure S13.** TEM of samples **2b-f-NP** derived from the same concentrated Py[6]-protected silver clusters with variable alkyl chain lengths from n-octyl to n-hexadecyl.

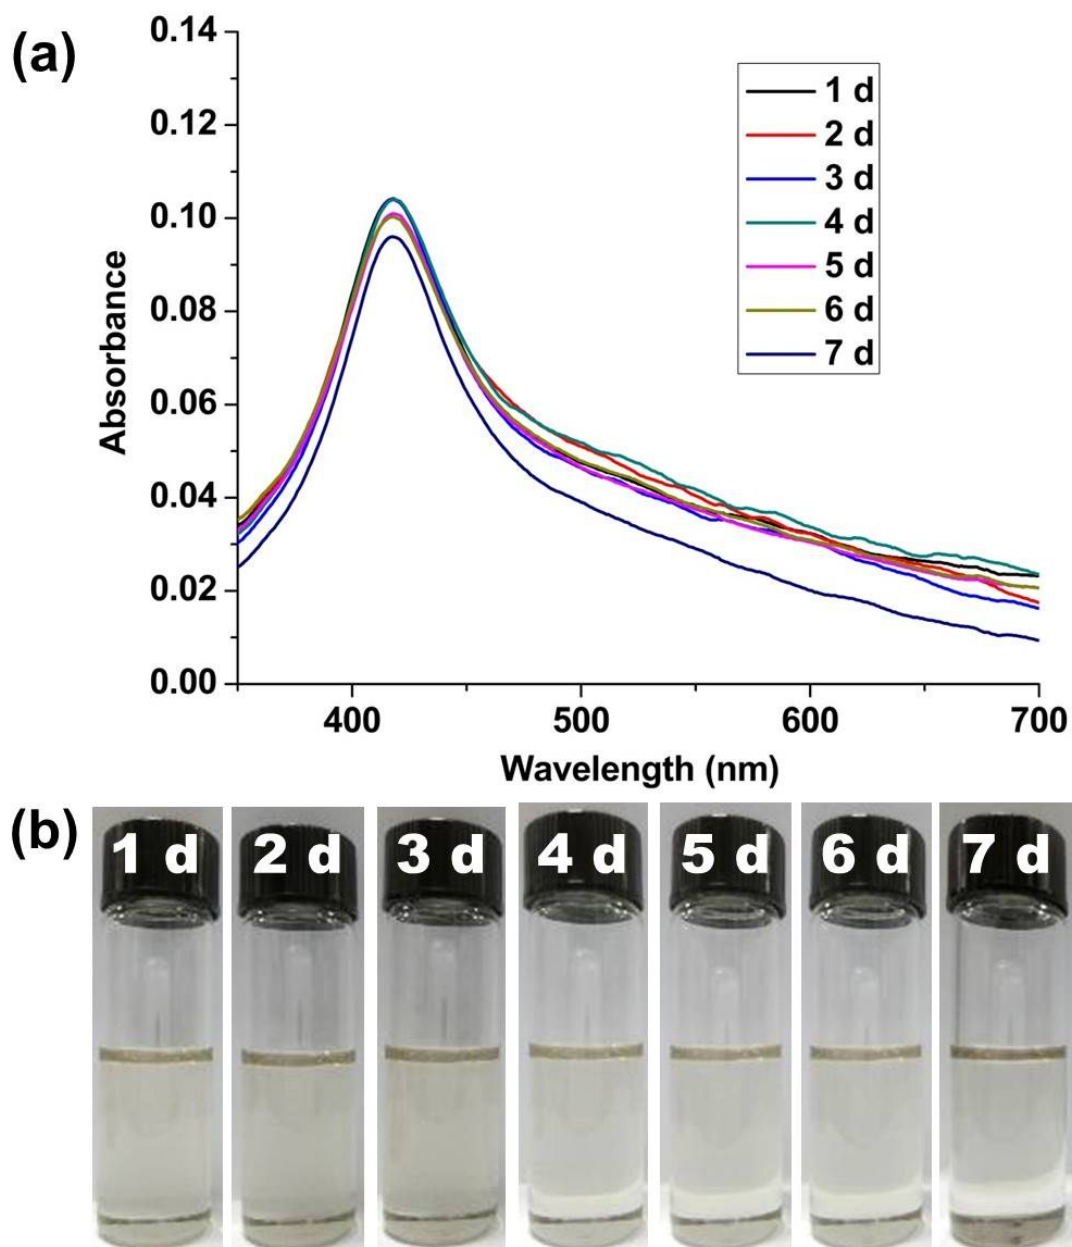

**Figure S14.** Monitoring the variation of (a) UV-vis spectra, and (b) photographs of **2d-Ag-NC** within one week to evaluate the stability of alkynyl-protected silver nanoclusters.

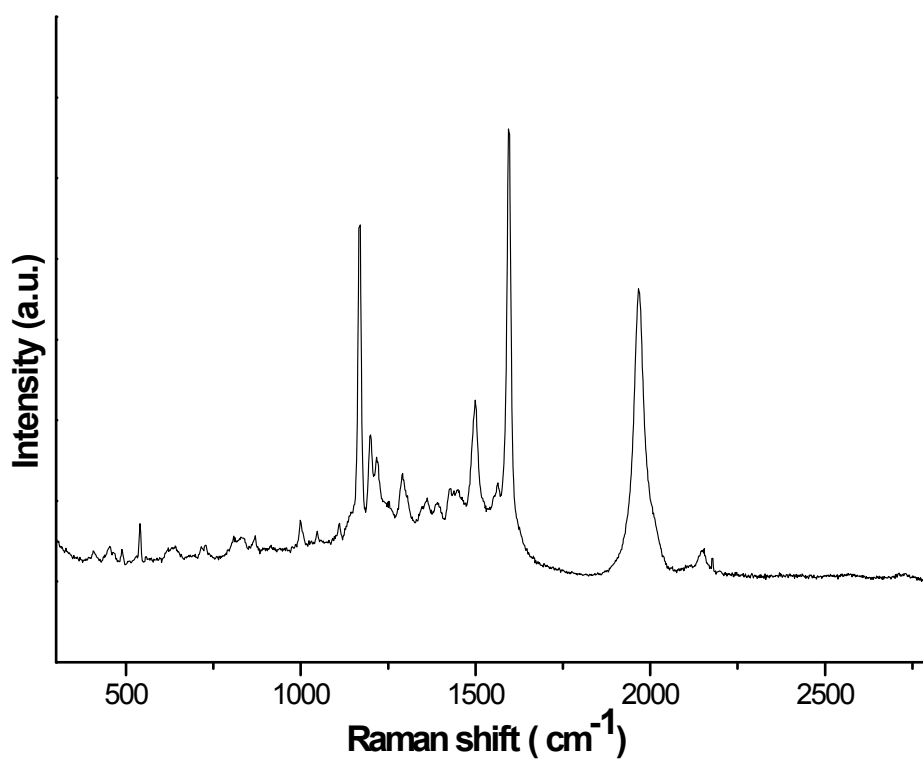

**Figure S15.** Raman spectrum of **2d-Ag-NC**. The Raman shift of  $\text{C}\equiv\text{C}$  is  $1970\text{ cm}^{-1}$ .

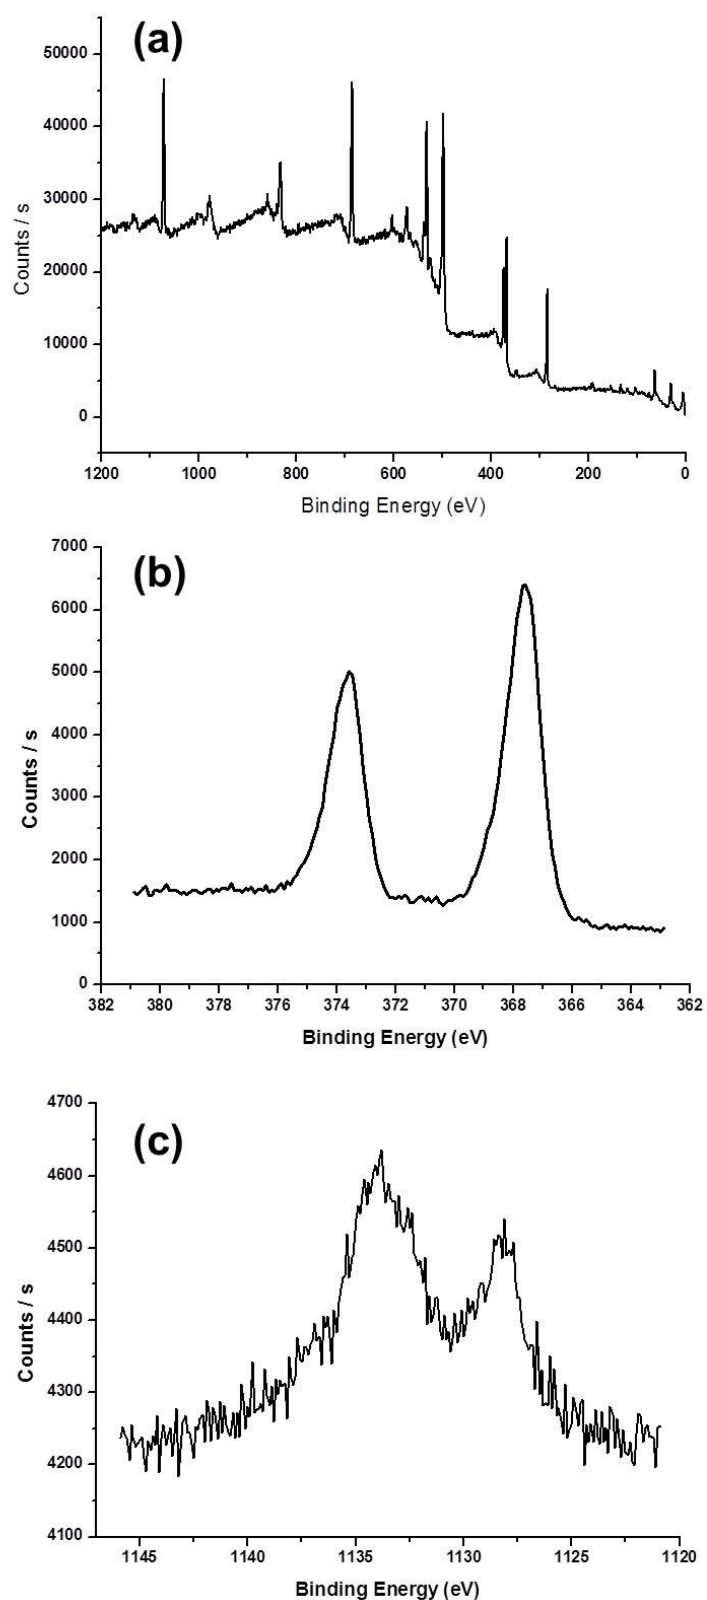

**Figure S16.** (a, b) X-ray photoelectron and (c) Auger electron spectroscopies of **2d-Ag-NC**. The binding energy peaks of Ag3d in XPS are 367.59 and 373.59 eV. In AES, the peaks are 1128.09 and 1133.79 eV.

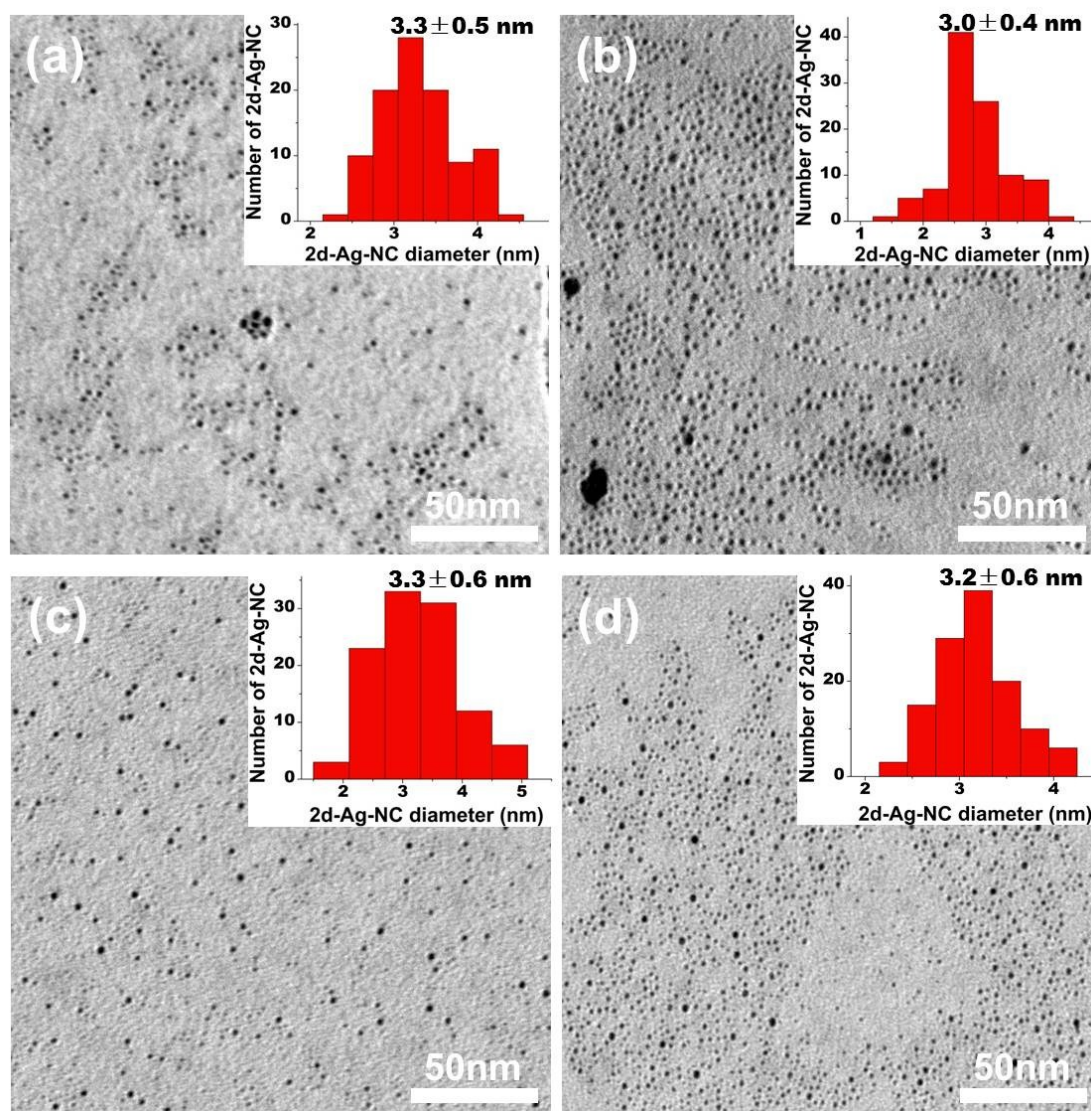

**Figure S17.** TEM images of 2d-Ag-NC. The concentration of 2d is (a) 0.8 g/L, 1.0 mL; (b) 0.8 g/L, 2.0 mL; (c) 0.8 g/L, 3.0 mL and (d) 0.8 g/L, 3.5 mL.
